# Supplementary material
Source: PubMed Central journal article supplement (PMC2176097)
Supplement: ajrccm_176_11_1084__1.pdf [file ajrccm_176_11_1084__1.pdf]

**Clinical Use of Ibuprofen is Associated with Slower FEV<sub>1</sub> Decline in Children with  
Cystic Fibrosis**

Michael W. Konstan, Mark D. Schluchter, Wei Xue, and Pamela B. Davis

**ONLINE DATA SUPPLEMENT**

## Additional Information Regarding the Longitudinal Statistical Model

Preliminary analyses found that the pattern of change in FEV<sub>1</sub> % predicted was not linear, and varied according to baseline age and FEV<sub>1</sub> % predicted. Thus, the basic model we fit allowed change in FEV<sub>1</sub> % predicted to be a quadratic function of time since baseline, stratified by age and level of FEV<sub>1</sub> % predicted into twelve strata formed by crossing 3 age strata (<8 yrs, 8-12 yrs, 13-17 yrs) with four strata of baseline FEV<sub>1</sub> % predicted (60-79%, 80-89%, 90-99%, ≥100%). Let  $y_{ij(c)}^{(s)}$  be the change from baseline in FEV<sub>1</sub> % predicted at the  $j^{\text{th}}$  follow-up time for the  $i^{\text{th}}$  patient from center  $c$  in stratum  $s$  defined by baseline age and FEV<sub>1</sub> % predicted, and let  $t_{ij(c)}$  be the time in years from baseline to the current year (here, an integer from 1 to 6), for  $i=1, \dots, n_c$ =number of patients in center  $c$ ,  $j=1, \dots, n_{i(c)}$ =number of follow-up measurements for patient  $i$  in center  $c$ ,  $c=1, \dots, C$  centers, and  $s=1, \dots, 12$  strata. The basic longitudinal statistical model was a multilevel mixed model, written as:

$$y_{ij(c)}^{(s)} = (\beta_1^{(s)} + b_{1c} + b_{1i(c)})t_{ij(c)} + (\beta_2^{(s)} + b_{2c} + b_{2i(c)})t_{ij(c)}^2 + \sum_{k=1}^p \theta_k X_{ik} t_{ij(c)} + b_{0c} + b_{0i(c)} + e_{ij(c)}.$$

Here,  $b_{0c}$ ,  $b_{1c}$ , and  $b_{2c}$  are random intercept, slope, and quadratic terms for the  $c^{\text{th}}$  center, assumed to be normally distributed with means of zero and 3x3 covariance matrix  $\Sigma_c$ . Similarly  $b_{0i(c)}$ ,  $b_{1i(c)}$ , and  $b_{2i(c)}$  are random intercept, linear, and quadratic effects for the  $i^{\text{th}}$  patient in the  $c^{\text{th}}$  center, also assumed to be normally distributed with means of zero and a 3x3 covariance matrix  $\Sigma$ , where the center-specific and patient-specific terms are independent. The terms  $\beta_1^{(s)}$  and  $\beta_2^{(s)}$  are fixed effects representing linear and quadratic trends over time for the  $s^{\text{th}}$  stratum of baseline age and FEV<sub>1</sub>% predicted,  $s=1, \dots, 12$ ,  $X_{ik(c)}$ ,  $k=1, \dots, p$  are measurements of  $p$  baseline covariates for the

$i^{\text{th}}$  patient in the  $i^{\text{th}}$  center,  $\theta_k$  are fixed effects regression parameters, and the  $e_{ij(c)}$  are residual random errors assumed to be independent of the other random effects with mean zero and variance  $\sigma^2$ . For example, if the  $k^{\text{th}}$  covariate  $X_{ik}$  is a binary variable coded as 1 if the patient used ibuprofen and 0 if not, then the regression coefficient  $\theta_k$  represents the mean difference in yearly rates of decline in FEV<sub>1</sub> % predicted in units of % predicted per year for a patient who is taking ibuprofen compared to a patient not taking ibuprofen, after controlling for the other variables in the model, which is the parameter of primary interest. Positive values for  $\theta_k$  indicate a beneficial effect of ibuprofen in that those taking ibuprofen have less negative slopes over time in FEV<sub>1</sub> % predicted.
